# Supplementary material for: Innate T-αβ lymphocytes as new immunological components of anti-tumoral “off-target” effects of the tyrosine kinase inhibitor dasatinib
Source: PubMed Central journal article supplement (PMC7039999; doi:10.1038/s41598-020-60195-z), 2020-02-24
Supplement: 41598_2020_60195_MOESM1_ESM.pdf [file 41598_2020_60195_MOESM1_ESM.pdf]

## SUPPLEMENTARY MATERIAL

### **Innate T- $\alpha\beta$ lymphocytes as new immunological components of anti-tumoral “off-target” effects of the tyrosine kinase inhibitor dasatinib**

**Alice Barbarin<sup>1,2</sup>, Myriam Abdallah<sup>1</sup>, Lucie Lefèvre<sup>1</sup>, Nathalie Piccirilli<sup>1,2</sup>, Emilie Cayssials<sup>1,2,3,4,5</sup>, Lydia Roy<sup>7,8</sup>, Jean-Marc Gombert<sup>1,2,5,6#</sup> and André Herbelin<sup>1,2,5,#,\*</sup>**

<sup>1</sup>INSERM 1082, Poitiers, France

<sup>2</sup>CHU de Poitiers, Poitiers, France

<sup>3</sup>Service d’Oncologie Hématologique de Thérapie Cellulaire, CHU de Poitiers, Poitiers, France

<sup>4</sup>INSERM CIC-1402, Poitiers, France

<sup>5</sup>Université de Poitiers, Poitiers, France

<sup>6</sup>Service d’Immunologie et Inflammation, CHU de Poitiers, Poitiers, France

<sup>7</sup>Service Clinique d’Hématologie, Hôpital Henri-Mondor, Créteil, France

<sup>8</sup>Université Paris-Est Créteil, Créteil, France

#A.H. and J.M.G. contributed equally to this work as senior authors.

**Corresponding author:** André Herbelin\*

Address: U1082 INSERM, Pôle Biologie Santé; 1, rue Georges Bonnet, 86000 Poitiers, France

Phone: (33) 5 49 45 43 41. Email: [andre.herbelin@inserm.fr](mailto:andre.herbelin@inserm.fr)

## Supplementary methods

**Supplementary Table 1.** CML Patients characteristics.

| Group   | n  | Age range | Age median | Age mean | Sex ratio |
|---------|----|-----------|------------|----------|-----------|
| DasaPEG | 54 | 20-65     | 48         | 46       | 1.7       |

All patients were confirmed Philadelphia chromosome-positive.

**Supplementary Table 2.**

Anti-mouse antibodies used in this study.

| Antibody        | Fluorochrome | Clone     | Supplier       | Reference     |
|-----------------|--------------|-----------|----------------|---------------|
| CD69            | BV421        | H1.2F3    | BD Biosciences | 562920        |
| CD3 $\epsilon$  | PerCP-Cy5.5  | 17A2      | BD Biosciences | 100218        |
| TCR- $\beta$    | PerCP-Cy5.5  | H57-597   | BioLegend      | 109228        |
| CD8             | BV510        | 53-6.7    | BD Biosciences | 563068        |
| CD44            | PE-Cy7       | IM7       | BD Biosciences | 560569        |
| CD62L           | PE           | MEL-14    | BD Biosciences | 553151        |
| CD49d           | Vioblue      | R1-2      | Miltenyi       | 130-102-404   |
| CD122           | APC          | TM-B1     | BioLegend      | 123214        |
| PLZF            | AF488        | Mags.21F7 | eBioscience    | 53-9320-82    |
| ROR- $\gamma$ T | APC          | B2D       | eBioscience    | 17-6981-82    |
| T-bet           | PE-Cy7       | 4B10      | BioLegend      | 644823        |
| panNK CD49b     | APC-Cy7      | DX5       | BioLegend      | 108920        |
| CD4             | PE           | RM4-5     | BD Biosciences | 553049        |
| CD24            | PE           | M1/69     | BD Biosciences | 553262        |
| Eomes           | AF488        | Dan11mag  | eBioscience    | 53-4875       |
| IFN $\gamma$    | PE/PE-Cy7    | XMG1.2    | BD Biosciences | 554412/557649 |

**Supplementary Table 3.**

Anti-human antibodies used in this study.

| Antibody                        | Fluorochrome | Clone     | Supplier        | Reference   |
|---------------------------------|--------------|-----------|-----------------|-------------|
| TCR- $\alpha\beta$              | BV421        | IP26      | BioLegend       | 306722      |
| CD3                             | BV421        | UCHT1     | BioLegend       | 300434      |
| CD161                           | PerCP-Cy5.5  | HP-3G10   | BioLegend       | 339908      |
| CD49d                           | BV510        | 9F10      | BioLegend       | 304318      |
| CD4                             | FITC         | RPA-T4    | BioLegend       | 300506      |
| TCR V $\alpha$ 24-J $\alpha$ 18 | APC          | 6B11      | BioLegend       | 342908      |
| CD8                             | PE-Cy7       | RPA-T8    | BD Pharmingen   | 557746      |
| Eomes                           | eFluor®660   | WD1928    | eBiosciences    | 50-4877-42  |
| PLZF                            | PE           | P3.62.8.1 | eBiosciences    | 12-4714-82  |
| KIR2D                           | PE           | NKVFS1    | Miltenyi Biotec | 130-092-688 |
| KIR3DL1/KIR3DL2 (CD158e/k)      | PE           | 5.133     | Miltenyi Biotec | 130-095-205 |
| NKG2A (CD159a)                  | PE           | REA110    | Miltenyi Biotec | 130-098-814 |

# Supplementary Figure 1

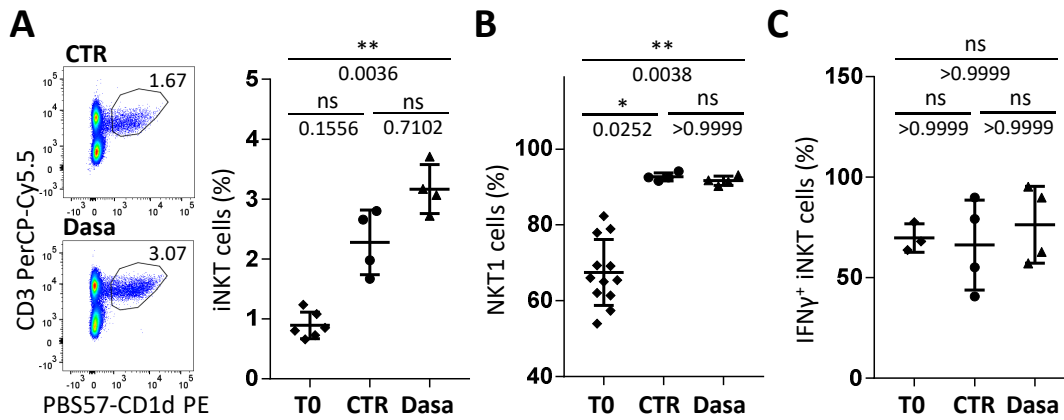

**Supplementary Figure 1. IL-15 promotes Th1 differentiation of iNKT cells *in vitro*.** (A, B and C) BALB/c Eomes-GFP derived splenocytes were directly analyzed (T0, n=12) or cultured 7 days in the presence of IL-15 with (Dasa, n=4) or without (CTR, n=4) dasatinib. iNKT cells percentages (A) and differentiation (B) into NKT1 subtype (T-bet<sup>+</sup> PLZF<sup>int</sup>) were analyzed in live lymphocytes by flow cytometry. (C) Splenocytes were further stimulated for 16h with IL-12 and IL-18 and IFN $\gamma$  secretion was analyzed in iNKT cells. Statistical analysis: Kruskal-Wallis.

## Supplementary Figure 2

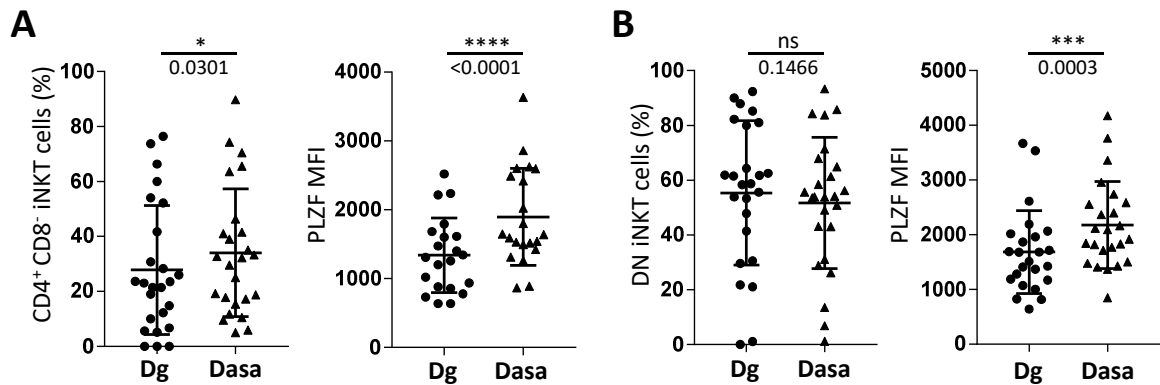

**Supplementary Figure 2. In CML patients under dasatinib treatment, iNKT cells are increased.** PBMCs isolated from patients (n=25) at CML diagnosis (Dg) or after 3 months of dasatinib treatment (Dasa) were analyzed by flow cytometry for iNKT cells. **(A)** Percentage of CD4<sup>+</sup> CD8<sup>-</sup> iNKT cells and PLZF MFI in this subset. **(B)** Percentage of DN (CD4<sup>-</sup> CD8<sup>-</sup>) iNKT cells and PLZF MFI in this subset. Statistical analysis: paired two-tailed Wilcoxon test.

## Supplementary Figure 3

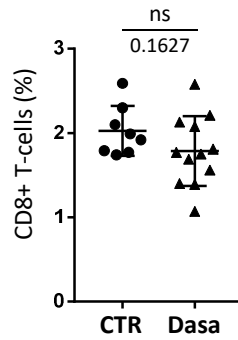

**Supplementary Figure 3. Dasatinib does not affect the total CD8 T-cells compartment *in vivo*.** Flow cytometry analysis of thymic cells from BALB/c WT mice orally gaved with dasatinib (Dasa, n=12) or its excipient (CTR, n=8) for 8 weeks. Analysis of TCR $\beta$ <sup>+</sup> CD8<sup>+</sup> T-cells among live mature lymphocytes (CD4<sup>-</sup> CD24<sup>-</sup>). Statistical analysis: two-tailed Mann-Whitney test.



## Supplementary Figure 5

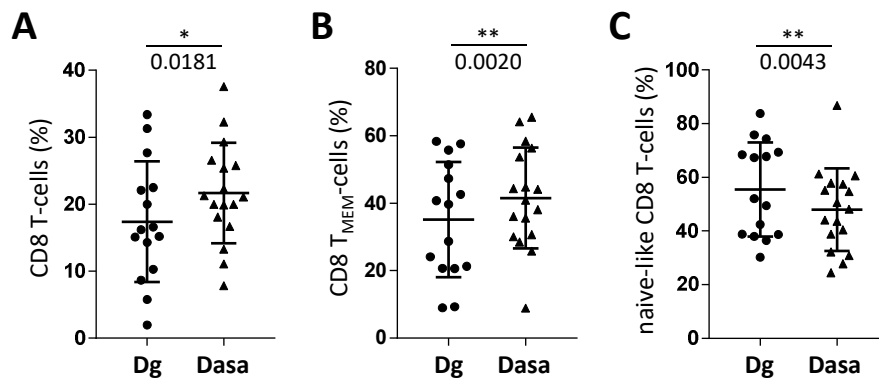

**Supplementary Figure 5.** CD8 T-cells subtypes repartition is modified in CML patients under dasatinib treatment. PBMCs isolated from patients (n=15) at CML diagnosis (Dg) or after 3 months of dasatinib treatment (Dasa) were analyzed by flow cytometry for CD8 T-cells (A) CD8 T<sub>MEM</sub> cells (B) and naive-like CD8 T-cells. Statistical analysis: paired two-tailed Wilcoxon test.

## Supplementary Figure 6

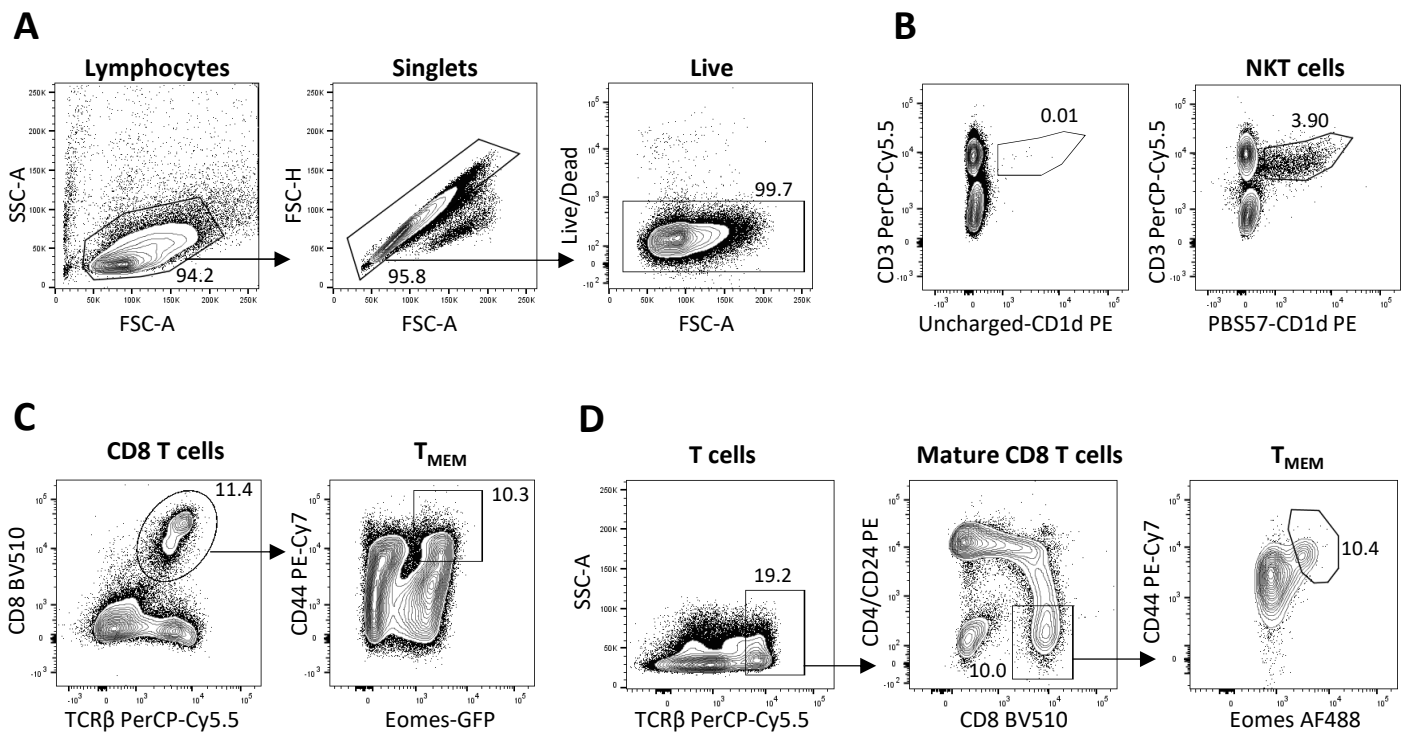

**Supplementary Figure 6.** Mouse gating trees for iNKT and  $T_{MEM}$  cells, related to Figures 1, 2 and 3. (A) Common gating tree to define live lymphocytes in spleen and thymus. (B) iNKT cells are defined as CD3<sup>+</sup> PBS57-CD1d<sup>+</sup> in spleen and thymus, uncharged CD1d tetramers were used as controls. (C and D) Gating tree for TCR $\beta$ <sup>+</sup> CD8<sup>+</sup>  $T_{MEM}$  cells populations in spleen (C) and thymus (D) preparations from BALB/c WT or BALB/c Eomes-GFP mice, respectively, based on CD44 and Eomes expression. Representative plots from a 10 weeks-old mice are shown.



## Supplementary Figure 7

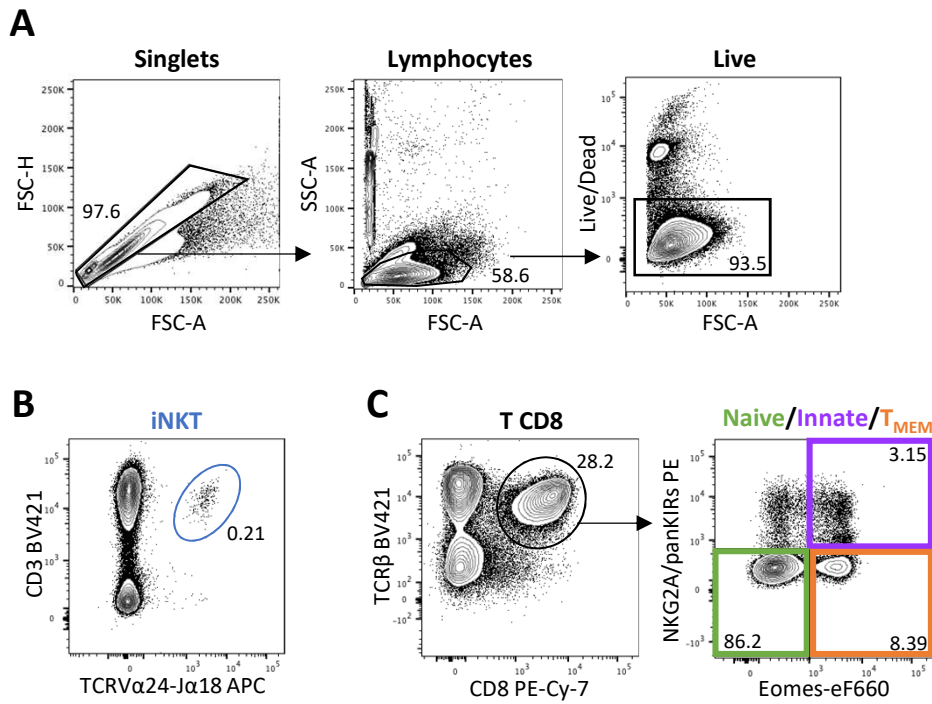

**Supplementary Figure 7.** Gating tree for iNKT, naive-like, T<sub>MEM</sub> and innate CD8 T cells, related to Figure 4. Human gating tree to define live iNKT cells (CD3<sup>+</sup> TCRVα24-Jα18<sup>+</sup>) and live TCRβ<sup>+</sup> CD8<sup>+</sup> naive-like, T<sub>MEM</sub> and innate CD8 T cells populations in PBMC-derived preparations based on panKIR/NKG2A and Eomes expression. Representative plots from a 43 years-old human are shown.
